# Supplementary material for: Comparative Transcriptome Profiling Reveals Defense-Related Genes against Meloidogyne incognita Invasion in Tobacco
Source: MDPI journal article supplement (doi:10.3390/molecules23082081), 2018-08-20
Supplement: s1 [file s1]

**Table S2.** Kyoto Encyclopedia of Genes and Genomes enriched pathways

| Pathways                                               | DEGs tested | All KEGG genes | P-value     | Pathway ID |
|--------------------------------------------------------|-------------|----------------|-------------|------------|
| Phenylpropanoid biosynthesis                           | 24          | 113            | 2.28E-15    | ko00940    |
| Tropane, piperidine and pyridine alkaloid biosynthesis | 6           | 20             | 2.20E-05    | ko00960    |
| Tyrosine metabolism                                    | 5           | 23             | 0.000594648 | ko00350    |
| Isoquinoline alkaloid biosynthesis                     | 4           | 14             | 0.000728791 | ko00950    |
| Pentose and glucuronate interconversions               | 6           | 39             | 0.001153767 | ko00040    |
| Starch and sucrose metabolism                          | 7           | 102            | 0.03982093  | ko00500    |
| Monobactam biosynthesis                                | 1           | 2              | 0.06261685  | ko00261    |
| Synthesis and degradation of ketone bodies             | 1           | 3              | 0.09246337  | ko00072    |
| Nitrogen metabolism                                    | 3           | 35             | 0.0975168   | ko00910    |
| Galactose metabolism                                   | 2           | 21             | 0.1421175   | ko00052    |
| Cyanoamino acid metabolism                             | 2           | 21             | 0.1421175   | ko00460    |
| Phenylalanine metabolism                               | 2           | 22             | 0.1532666   | ko00360    |
| Arginine biosynthesis                                  | 2           | 23             | 0.1645834   | ko00220    |
| beta-Alanine metabolism                                | 2           | 24             | 0.1760465   | ko00410    |
| Alanine, aspartate and glutamate metabolism            | 3           | 50             | 0.2107882   | ko00250    |
| Glycine, serine and threonine metabolism               | 2           | 28             | 0.2229728   | ko00260    |
| Glycerophospholipid metabolism                         | 2           | 28             | 0.2229728   | ko00564    |
| Sulfur metabolism                                      | 1           | 9              | 0.2528909   | ko00920    |
| Photosynthesis                                         | 1           | 9              | 0.2528909   | ko00195    |
| Selenocompound metabolism                              | 1           | 9              | 0.2528909   | ko00450    |
| Nicotinate and nicotinamide metabolism                 | 1           | 11             | 0.299897    | ko00760    |
| Butanoate metabolism                                   | 1           | 13             | 0.3439925   | ko00650    |
| Terpenoid backbone biosynthesis                        | 1           | 16             | 0.4050636   | ko00900    |
| Biosynthesis of unsaturated fatty acids                | 1           | 18             | 0.4426356   | ko01040    |
| Circadian rhythm – plant                               | 1           | 23             | 0.5266595   | ko04712    |
| alpha-Linolenic acid metabolism                        | 1           | 23             | 0.5266595   | ko00592    |
| Fatty acid degradation                                 | 1           | 31             | 0.635902    | ko00071    |

|                                            |   |     |           |         |
|--------------------------------------------|---|-----|-----------|---------|
| Valine, leucine and isoleucine degradation | 1 | 32  | 0.6476793 | ko00280 |
| Arginine and proline metabolism            | 1 | 37  | 0.7011743 | ko00330 |
| Plant hormone signal transduction          | 3 | 119 | 0.7428598 | ko04075 |
| Plant-pathogen interaction                 | 1 | 42  | 0.7466637 | ko04626 |
| Fatty acid metabolism                      | 1 | 42  | 0.7466637 | ko01212 |
| Purine metabolism                          | 1 | 46  | 0.7780904 | ko00230 |
| Carbon metabolism                          | 2 | 90  | 0.7917009 | ko01200 |
| Glycolysis/Gluconeogenesis                 | 1 | 53  | 0.8241258 | ko00010 |
| Phagosome                                  | 1 | 55  | 0.8354571 | ko04145 |

DEGs: Differentially expressed genes
