# Supplementary material for: Comparative Transcriptome Profiling Reveals Defense-Related Genes against Meloidogyne incognita Invasion in Tobacco
Source: MDPI journal article supplement (doi:10.3390/molecules23082081), 2018-08-20
Supplement: s1 [file s1]

**Table S1.** Validated list of gene primers used for quantitative real time-PCR.

| No. | Gene Symbol | Gene_ID            | Forward primer       | Reverse primer           | Tm (°C) |
|-----|-------------|--------------------|----------------------|--------------------------|---------|
| 1   | PER47       | gene_20009         | GGGGGATTGTGAATGGTTAT | CCAAACAGACAACCAACATT     | 54      |
| 2   | PER3        | gene_9714          | CTGGTATTATGTATCCTTGG | CCTCTCAATGTTAGATTAGG     | 50      |
| 3   | ILR3        | gene_7582          | ACCAGGCTTTCTCTCCCATC | GCCACATCGCAACACTAGGA     | 59      |
| 4   | RAP23       | gene_13223         | TAGCACCATTTTAGAGAGTT | AGTCATCCATCAGAAACATA     | 51      |
| 5   | PR1         | Novel00153         | ATTGAACCATCCTGTAGTTA | CCTAATCTGGATAGAGTGTT     | 51      |
| 6   | bgl13       | gene_74391         | CTGTCCGATTTGGCCTCACT | TATTGGACGGTGGTCCCTCT     | 59      |
| 7   | PPO         | gene_60360         | TCGCCGAATAATGCTGAGTT | GTATAGCGGGAGCTTAGTGC     | 57      |
| 8   | HMCS        | gene_5079          | GTTTGAAAGCAAGATCAGGG | GCTTGTGTATGGTGAATGG      | 54      |
| 9   | TGA         | gene_2903          | TGAAGCGTGGACTTTATTGA | TTGCCAATGAGCTTAATCCT     | 54      |
| 10  | HST         | gene_67788         | CAGGTTTGGTATCGTTGTTG | GCCTCAACCCAATCTATCAA     | 54      |
| 11  | SAMT        | gene_78079         | AACAAATTAAGGGTTCAATG | ACTACATAAAATTAGCAGCTC    | 49      |
| 12  | TPS9        | gene_9996          | GCTTTTCCCCCAATTTATAG | GCAAATTGTCAACCTTCTAA     | 51      |
| 13  | FSPM        | gene_85241         | CTGCTACTGGTGAAGGTTAT | AGCACGGCTAACATTAAGAT     | 54      |
| 14  | LAML        | gene_82351         | GTTTCTGTTGTAGTTCACCC | CATCAATCCAACCAACATCA     | 50      |
| 15  | LEA5        | gene_1320          | GACTCTTAGCTCAATAACAA | TTGTTTGATTCCCTCTACAC     | 54      |
| 16  | L25         | Internal reference | CCCCTCACCACAGAGTCTGC | AAGGGTGTTGTTGTCCTCAATCTT | 56      |
